# Supplementary material
Source: PubMed Central journal article supplement (PMC2688718)
Supplement: NIHMS100297-supplement-supplement_1.pdf [file NIHMS100297-supplement-supplement_1.pdf]

Supplemental Table 1. Vk-Jk usage

| Family                 | R4A       | R4A x FcγRIIB <sup>-/-</sup> |
|------------------------|-----------|------------------------------|
| <b>Vk1</b>             |           |                              |
| BB1-Jk1 <sup>a</sup>   | 2         | 16                           |
| BB1-Jk 2               | 4         | 6                            |
| BB1-Jk4 <sup>a</sup>   | 3         | 10                           |
| BB1-Jk5 <sup>b</sup>   | 3         | 0                            |
| <b>Total</b>           | <b>12</b> | <b>32</b>                    |
| <b>Vk4/5</b>           |           |                              |
| AH4-Jk5                | 5         | 2                            |
| KB4-Jk2                | 2         | 1                            |
| KB4-Jk4                | 2         | 0                            |
| KF4-Jk5                | 3         | 1                            |
| KK4-Jk5                | 5         | 1                            |
| <b>Total</b>           | <b>19</b> | <b>5</b>                     |
| <b>Vk9/10</b>          |           |                              |
| Bv9-Jk5                | 3         | 3                            |
| CE9-Jk4                | 0         | 1                            |
| CE9-Jk5                | 0         | 3                            |
| <b>Total</b>           | <b>3</b>  | <b>7</b>                     |
| <b>Vk12</b>            |           |                              |
| 12-44-Jk2              | 0         | 2                            |
| 12-44-Jk4              | 0         | 1                            |
| <b>Total</b>           | <b>0</b>  | <b>3</b>                     |
| <b>Vk21</b>            |           |                              |
| 21-2-Jk1               | 4         | 0                            |
| 21-4-Jk1               | 0         | 3                            |
| 21-2-Jk2               | 0         | 2                            |
| 21-2-Jk4               | 0         | 2                            |
| 21-5-Jk2               | 0         | 2                            |
| 21-12-Jk5              | 0         | 4                            |
| <b>Total</b>           | <b>4</b>  | <b>13</b>                    |
| <b>Vk23</b>            |           |                              |
| 23-48-Jk4              | 0         | 4                            |
| 23-48-Jk5              | 0         | 3                            |
| <b>Total</b>           | <b>0</b>  | <b>7</b>                     |
| <b>Vk24/Vk25</b>       |           |                              |
| HF24-Jk4               | 2         | 0                            |
| HF24-Jk5               | 2         | 0                            |
|                        | <b>4</b>  | <b>0</b>                     |
| <b>Total sequenced</b> | <b>42</b> | <b>67</b>                    |

VK families were identified using the IgBLAST algorithm. <sup>a</sup>Germline genes that generate high affinity anti-DNA antibodies when paired with the R4A H chain.

<sup>b</sup>Germline gene that generate a low affinity anti-DNA antibodies when paired with the R4A H chain.

ACCEPTED MANUSCRIPT

**Supplemental Table II. Phenotype of FcγRIIB<sup>-/-</sup> DCs.**

|                              | % CD86 <sup>+</sup>        | %CD83 <sup>+</sup>        |
|------------------------------|----------------------------|---------------------------|
| <b>WT</b>                    | 34.8 (± 16.3)              | 20.1 (± 4.7)              |
| <b>FcγRIIB<sup>-/-</sup></b> | 52.7% (± 3.1) <sup>a</sup> | 35.4 (± 6.8) <sup>b</sup> |

The percentage of CD86<sup>+</sup> and CD83<sup>+</sup> DCs was determined by flow cytometry. Data are presented as the mean ± SD. <sup>a</sup>*p* = 0.057; <sup>b</sup>*p* < 0.029 determined by Mann-Whitney.

Supplemental Table III. Cytokine profile of medium and LPS-treated DCs

|              | WT                       |                 | FcγRIIB <sup>-/-</sup> |                 |
|--------------|--------------------------|-----------------|------------------------|-----------------|
|              | medium                   | LPS             | medium                 | LPS             |
| <b>TNFα</b>  | 1.6 (± 0.3)              | 6.7 (± 4.0)     | 1.2 (± 0.2)            | 5.6 (± 2.3)     |
| <b>IL-6</b>  | 1.7(± 0.4)               | 554.0 (± 127.3) | 3.1 (± 1.6)            | 819.0 (± 245.8) |
| <b>IL-10</b> | 6.6 (± 4.2)              | 3052 (± 1813)   | 6.2 (± 4.8)            | 3319 (± 1298)   |
| <b>IL-12</b> | 6.4 (± 2.2) <sup>a</sup> | 78.4 (± 17.2)   | 2.4 (± 1.0)            | 94.6 (± 42.6)   |

Cytokine responses to medium and LPS were measured by qPCR. Values are expressed as the mean ± SD of the relative expression levels normalized to *polr2a*.

There were no statistically significant differences in the cytokine responses to medium or LPS between WT and FcγRIIB<sup>-/-</sup> DCs, with the exception of IL-12<sup>a</sup>, which was lower in medium-treated FcγRIIB<sup>-/-</sup> DCs ( $p < 0.03$  as determined by Mann-Whitney).

**Supplemental Table IV. Cytokine profile of sera-treated DCs**

| <b>sera</b>                   | <b><u>WT mDCs</u></b> |                                                      | <b><u>Fc<math>\gamma</math>RIIB<sup>-/-</sup> mDCs</u></b> |                                                      |
|-------------------------------|-----------------------|------------------------------------------------------|------------------------------------------------------------|------------------------------------------------------|
|                               | <b>R4A</b>            | <b>R4A x Fc<math>\gamma</math>RIIB<sup>-/-</sup></b> | <b>R4A</b>                                                 | <b>R4A x Fc<math>\gamma</math>RIIB<sup>-/-</sup></b> |
| <b>TNF<math>\alpha</math></b> | 0.9 ( $\pm$ 0.1)      | 1.4 ( $\pm$ 0.4)                                     | 0.9 ( $\pm$ 0.1)                                           | 1.6 ( $\pm$ 0.7)                                     |
| <b>IL-6<sup>a</sup></b>       | 1.6 ( $\pm$ 0.2)      | 3.2 ( $\pm$ 0.8)                                     | 1.8 ( $\pm$ 0.2)                                           | 4.0 ( $\pm$ 2.0)                                     |
| <b>IL-10<sup>a</sup></b>      | 6.7 ( $\pm$ 1.2)      | 45.2 ( $\pm$ 30.2)                                   | 5.0 ( $\pm$ 2.1)                                           | 12.2 ( $\pm$ 18.7)                                   |
| <b>IL-12</b>                  | 3.9 ( $\pm$ 1.7)      | 4.2 ( $\pm$ 1.0)                                     | 2.2 ( $\pm$ 0.8)                                           | 2.9 ( $\pm$ 1.2)                                     |

Cytokine responses of DCs to sera treatment were measured by qPCR. Values are expressed as the mean  $\pm$  SD of the relative expression levels normalized to *polr2a*.

<sup>a</sup>Data and statistics are presented in Figures 6a and 6b.
